# Supplementary material for: Chronic Ingestion of Flavan-3-ols and Isoflavones Improves Insulin Sensitivity and Lipoprotein Status and Attenuates Estimated 10-Year CVD Risk in Medicated Postmenopausal Women With Type 2 Diabetes: A 1-year, double-blind, randomized, controlled trial
Source: PubMed Central journal article supplement — Diabetes Care. 2012 Jan 16;35(2):226–32. doi: 10.2337/dc11-1443 (PMC3263874; doi:10.2337/dc11-1443), 2012-01-16
Supplement: supp_dc11-1443v111443_DC111443SupplementaryData.pdf [file supp_dc11-1443v111443_DC111443SupplementaryData.pdf]

SUPPLEMENTARY DATA

**Supplementary Table 1.** Habitual dietary intakes in the 93 patients who completed the 1 year flavonoid intervention

|                                 | Flavonoid      |                 | Placebo        |                 | Between group comparisons of dietary intake (p-value) |          |
|---------------------------------|----------------|-----------------|----------------|-----------------|-------------------------------------------------------|----------|
|                                 | 0 month (n=47) | 12 month (n=46) | 0 month (n=46) | 12 month (n=46) | 0 month                                               | 12 month |
| Energy intake, Kcal /d          | 1745 ± 64      | 1670 ± 55       | 1703 ± 50      | 1547 ± 52       | 0.61                                                  | 0.11     |
| Protein, % total energy         | 16.8 ± 0.4     | 17.5 ± 0.4      | 17.8 ± 0.5     | 18.2 ± 0.5      | 0.12                                                  | 0.34     |
| Total Fat, % total energy       | 32.3 ± 0.8     | 33.5 ± 0.9      | 33.4 ± 0.7     | 33.4 ± 0.7      | 0.28                                                  | 0.95     |
| Carbohydrate, % total energy    | 49.9 ± 0.9     | 48.4 ± 0.9      | 48.3 ± 0.8     | 47.8 ± 0.9      | 0.19                                                  | 0.60     |
| Alcohol, % total energy         | 1.1 ± 0.3      | 0.7 ± 0.2       | 0.6 ± 0.2      | 0.7 ± 0.2       | 0.17                                                  | 0.88     |
| Fruit and vegetable intake, g/d | 430 ± 32       | 369 ± 24        | 383 ± 25       | 334 ± 25        | 0.15                                                  | 0.32     |

Data are means ± SEM or %.
